# Supplementary material
Source: PubMed Central journal article supplement (PMC3004157)
Supplement: NIHMS257272-supplement-Supplementary_Information.pdf [file NIHMS257272-supplement-Supplementary_Information.pdf]

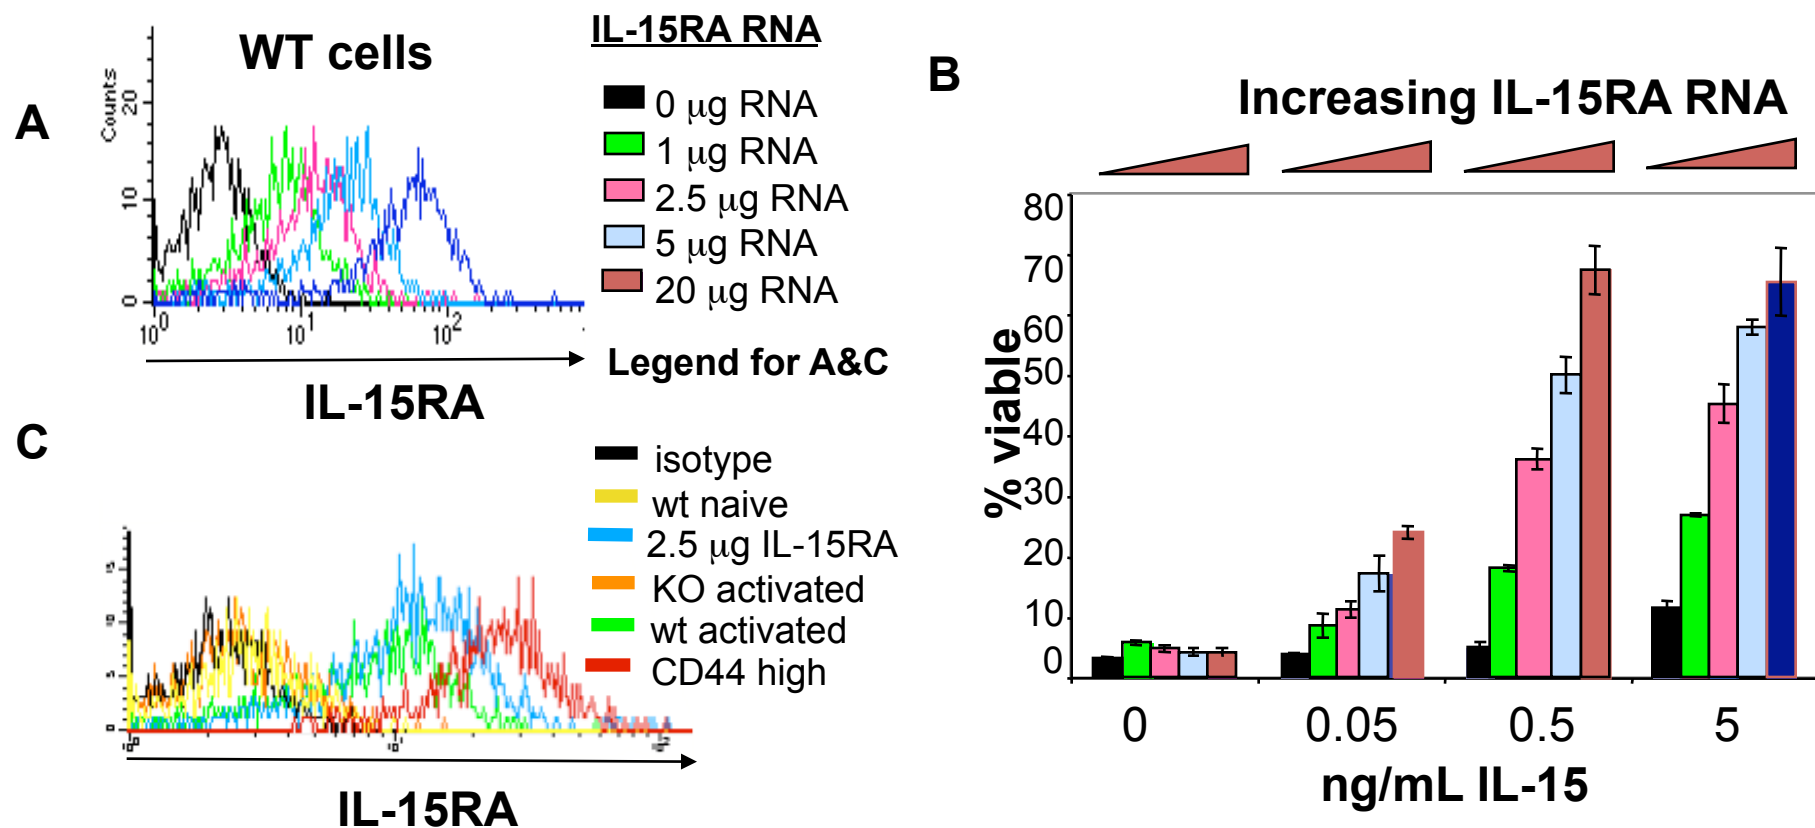

**Supporting Information Figure 1. Characterization of the viability of CD8<sup>+</sup> T cells from WT mice transfected with varying amounts of IL-15RA RNA.** Unstimulated CD8<sup>+</sup> T cells were isolated from naive WT C57BL/6 mice.  $1 \times 10^6$  cells were transfected with increasing amounts IL-15RA RNA. **A)** Histogram representation of IL-15RA expression in CD8<sup>+</sup> T cells transfected with increasing amounts of IL-15RA RNA. **B)** Bar graph representing the percentage of viable CD8<sup>+</sup> T cells that were transfected with increasing doses of IL-15RA RNA and cultured for 4 days post transfection in the presence of increasing doses of IL-15 (means  $\pm$  s.e.). **C)** Histogram representation of IL-15RA expression in various CD8<sup>+</sup> T cells. Unstimulated CD8<sup>+</sup> T cells transfected with 2.5 µg IL-15RA RNA were compared with CD44 high gated CD8<sup>+</sup> splenocytes obtained from 3 days stimulation with 60 ng/mL LPS + 60 ng/mL IFN gamma, or with activated CD8<sup>+</sup> T cells from WT mice or IL-15RA <sup>-/-</sup> mice, which were stimulated for 3 days with CD3, CD28, and IL-2. Activated IL-15RA <sup>-/-</sup> T cells and activated T cells stained with isotype antibody were used as negative controls. The data shown here are representative of two experiments performed.

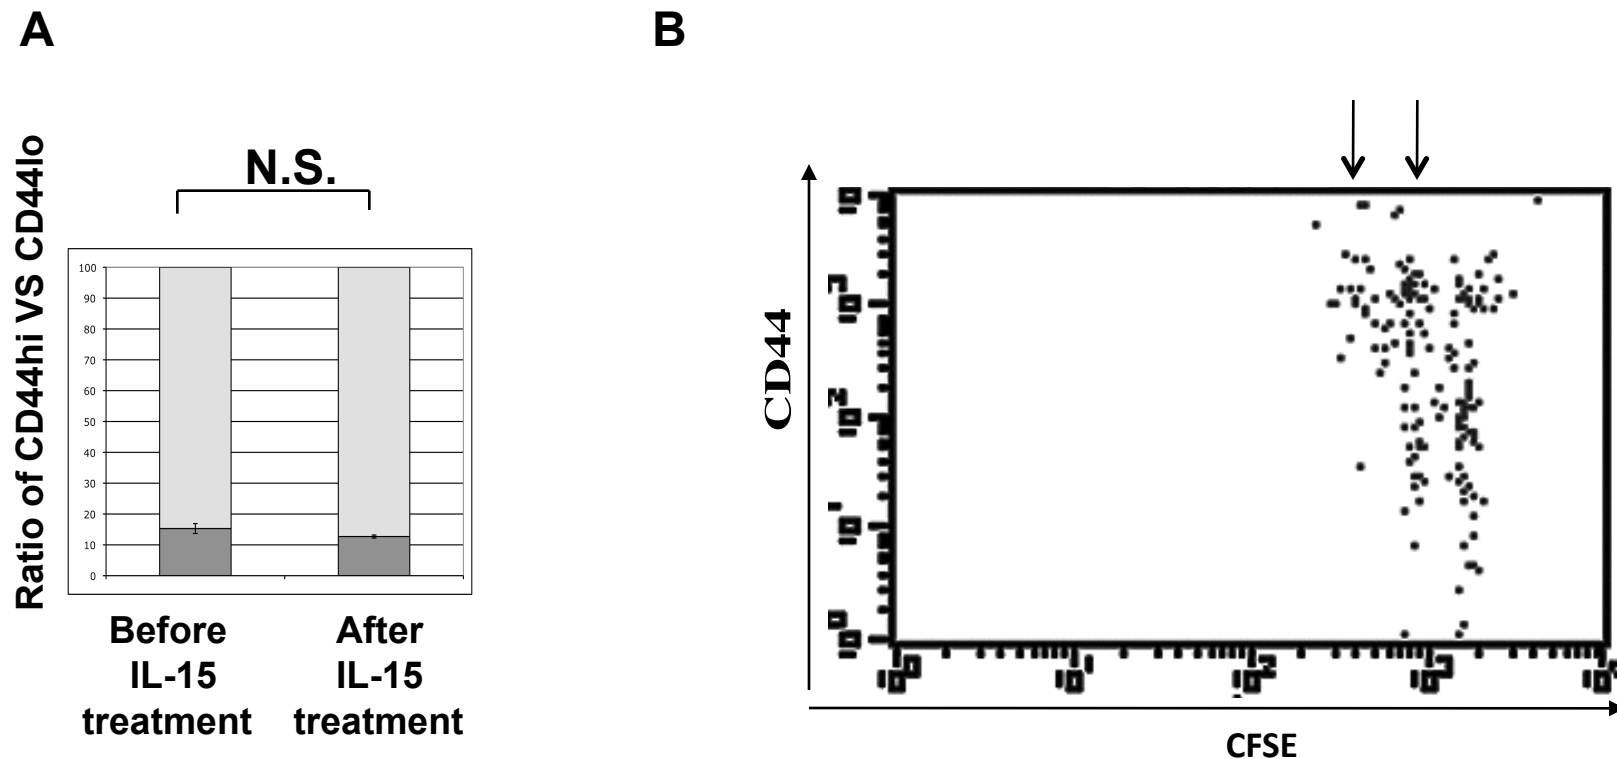

**Supporting Information Figure 2. Characterization of CD44 expression on transfected CD8<sup>+</sup> T cells in culture or after adoptive transfer.** **A.** Bar graph representing the ratio of CD44<sup>hi</sup> versus CD44<sup>lo</sup> cells after IL-15RA transfection and before and after 4 days culture in the presence IL-15. CD8<sup>+</sup> T cells were isolated from C57BL/6 mice. Cells were transfected with IL-15RA. Following transfection cells were stained for CD44 expression before or after culture for 4 days in the presence of 5 ng/mL IL-15. **B.** Flow cytometry data representing CD44 expression on THY1.1 positive and 7-AAD negative gated cells. Arrows indicate first and second divisions. Splenocytes were isolated from naive C57BL/6 THY1.1 congenic mice and were differentially labeled with or without CFSE. CD8<sup>+</sup> cells were transfected with IL-15/IL-15RA RNA.  $1 \times 10^6$ /mouse of CFSE labeled CD8<sup>+</sup> T cells transfected with IL-15/IL-15RA RNA were transferred i.v. into C57BL/6 THY1.2 mice. 7 days later, splenocytes were isolated and stained with 7-AAD, CD44, and THY1.1 and analyzed for CD44 expression and CFSE dilution by flow cytometry. Experiments were performed in triplicate. N.S., not significant according to student T test.

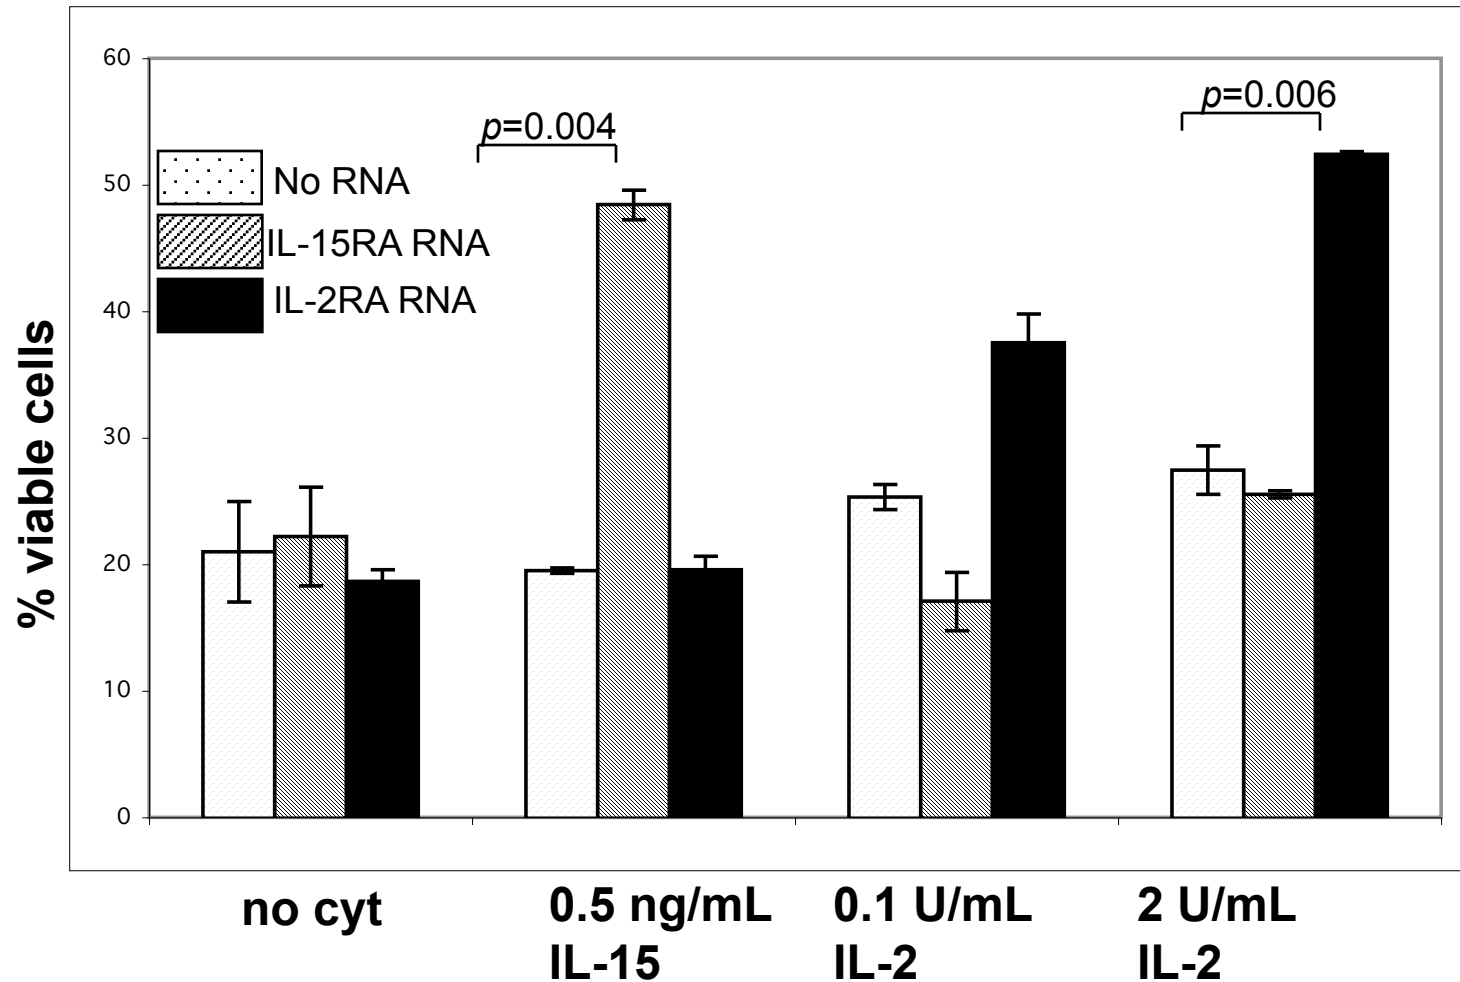

**Supporting Information Figure 3. Flow cytometry analysis to characterize the % viability of CD8+ T cells transfected with IL-2RA RNA or IL-15RA RNA and cultured in IL-2 or IL-15.** CD8+ T cells were purified from the spleens of C57BL/6 mice and transfected with no RNA (dotted bars), IL-15RA RNA (hatched bars), or IL-2RA RNA (solid bars). Within 3 hours of transfection, cells were plated in 96 well U bottom plate with 0 or 0.5 ng/mL IL-15 or 0, 0.1, or 2 units/mL IL-2. 4 days later cells were analyzed for viability by 7 AAD staining. Undadjusted P value determined by student T test.

**A**

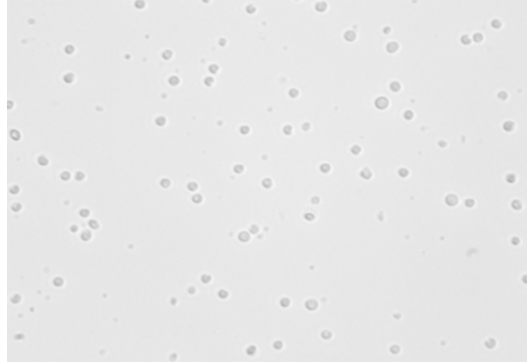

**B**

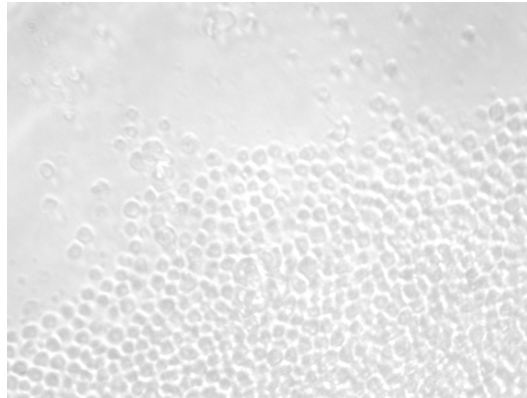

**Supporting Information Figure 4. Photographic images of CD8+ T cells in culture.**  $1 \times 10^5$  transfected cells were cultured in **A)** 6-well plates to minimize cell-cell contact or **B)** 96-well plates and centrifuged briefly to enhance cell-cell contact.

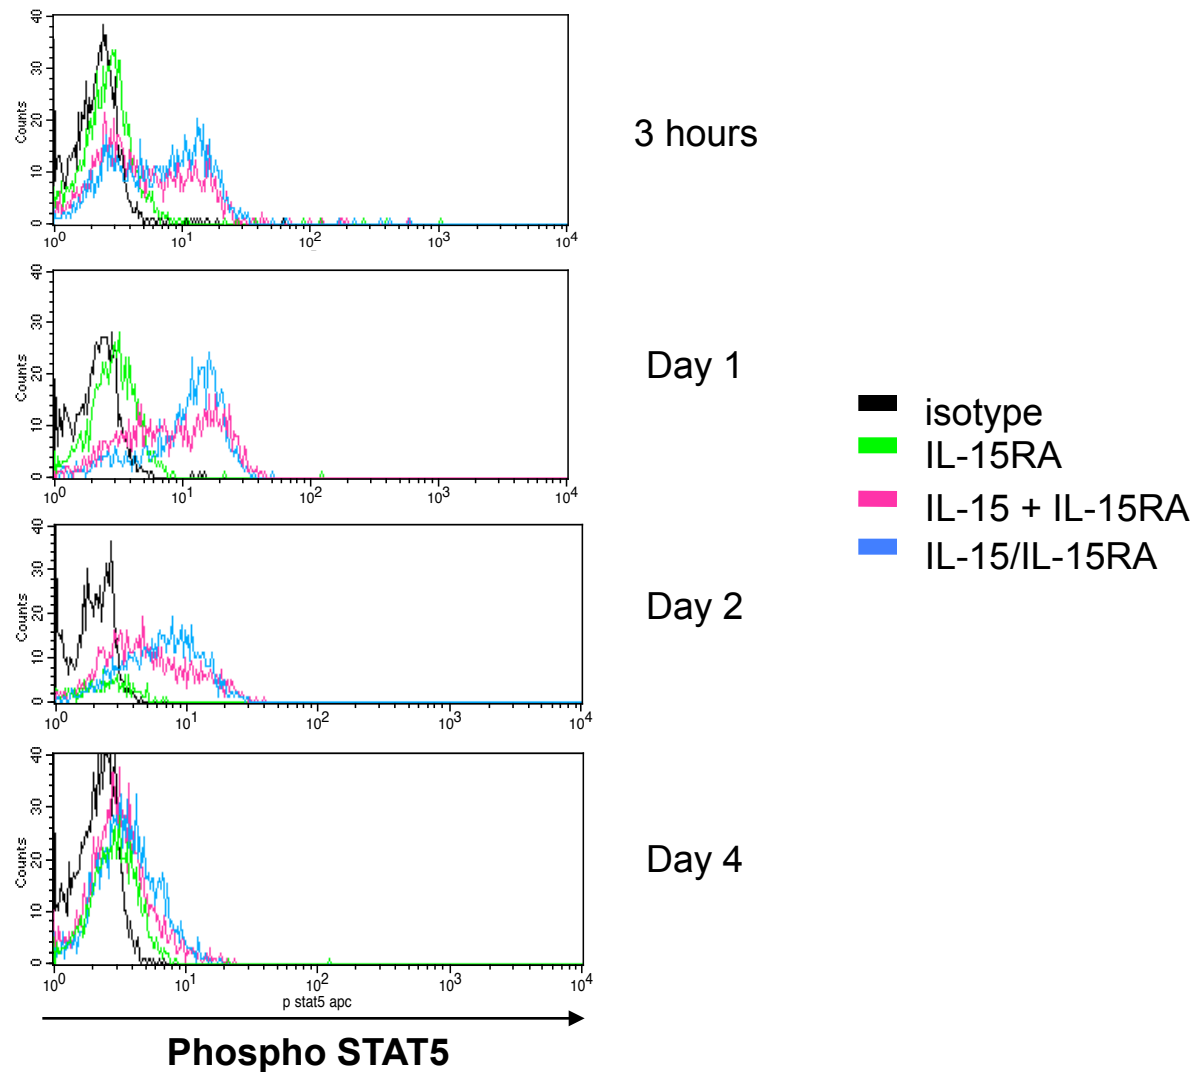

**Supporting Information Figure 5. Analysis of STAT5 phosphorylation in cells transfected with IL-15 + IL-15RA RNA or IL-15/IL-15RA RNA.** Histograms comparing intensity of phospho-STAT5 staining in transfected cells at different time points after transfection. Unstimulated CD8<sup>+</sup> T cells were isolated from naïve C57BL/6 mice.  $1 \times 10^6$  cells were transfected with IL-15RA RNA alone as baseline control, IL-15 + IL-15RA, or IL-15/IL-15RA RNA. 3 hours, 1 day, 2 days or 4 days after transfection, cells were stained intracellularly for phospho-STAT5 and analyzed by flow cytometry.

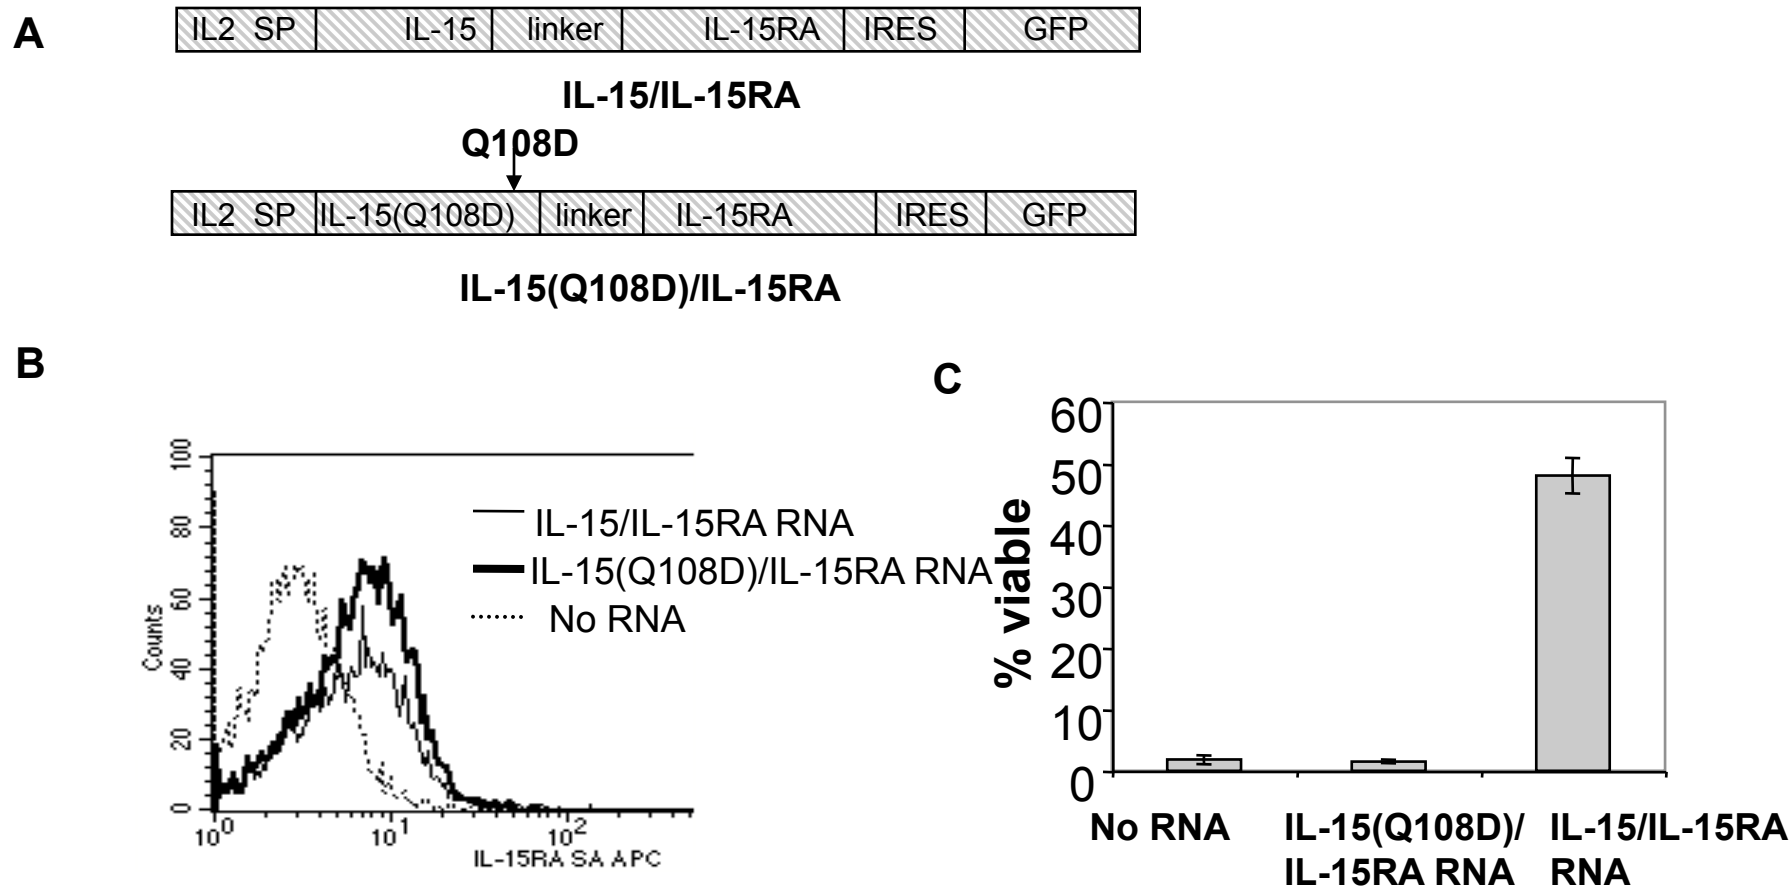

**Supporting Information Figure 6. Characterization of the expression and effect on survival of transfection of IL-15/IL-15RA RNA with a point mutation in the  $\gamma c$  binding region of IL-15 (IL-15 (Q108D)/IL-15RA).** Unstimulated CD8<sup>+</sup> T cells were isolated from naïve C57BL/6 mice.  $1 \times 10^6$  cells were transfected with IL-15/IL-15RA RNA, IL-15(Q108D)/IL-15RA RNA, or no RNA. Cells were stained for IL-15RA expression 1 day after transfection or stained with 7-AAD and analyzed by flow cytometry for viability 4 days after transfection. A. Depiction of the IL-15(Q108D)/IL-15RA mutant. B. Histograms comparing intensity of IL-15RA surface staining in transfected cells 1 day after transfection. C. Bar graph representing viability of transfected cells 4 days after transfection (means $\pm$ s.e.). Assays were performed in duplicate. Shown is a representative of 2 independent experiments with similar results.
